# Supplementary material for: Myosin di-phosphorylation and peripheral actin bundle formation as initial events during endothelial barrier disruption
Source: PubMed Central journal article supplement (PMC4750094; doi:10.1038/srep20989), 2016-02-11

## Supplementary information

### **Myosin di-phosphorylation and peripheral actin bundle formation as initial events during endothelial barrier disruption**

Mayumi Hirano<sup>1</sup> and Katsuya Hirano<sup>2,\*</sup>

<sup>1</sup> Department of Molecular Cardiology, Research Institute of Angiocardiology, Graduate School of Medical Sciences, Kyushu University

<sup>2</sup> Department of Cardiovascular Physiology, Faculty of Medicine, Kagawa University

### **Legend for Supplementary Figure S1**

The effects of blebbistatin on the thrombin-induced changes in the TEER and MLC phosphorylation in PAECs.

(a) The effects of 50  $\mu\text{M}$  ( $n = 4$ ) and 100  $\mu\text{M}$  ( $n = 7$ ) blebbistatin on the temporal changes in the TEER induced by 1  $\text{u ml}^{-1}$  thrombin (Control;  $n = 7$ ). (b) A representative immunoblot (IB) and a summary ( $n = 4$ ) of the levels of pMLC and ppMLC obtained before (-) and 3 min after (+) stimulation with 1  $\text{u ml}^{-1}$  thrombin, in the absence and presence of 100  $\mu\text{M}$  blebbistatin. PAECs were exposed to blebbistatin 30 min prior to and during thrombin stimulation. The data are the means  $\pm$  SEM. ns, not significantly different; \*,  $P < 0.05$  (vs. Control in a), according to an ANOVA followed by Dunnett's post-hoc test (a) and the Turkey-Kramer test (b).

Supplementary Figure S1

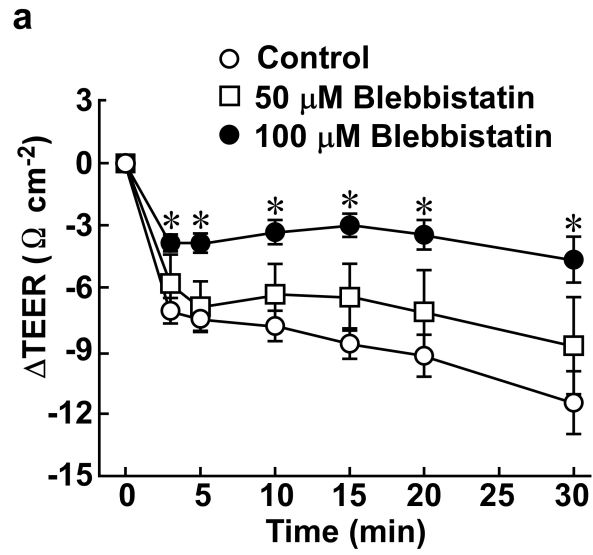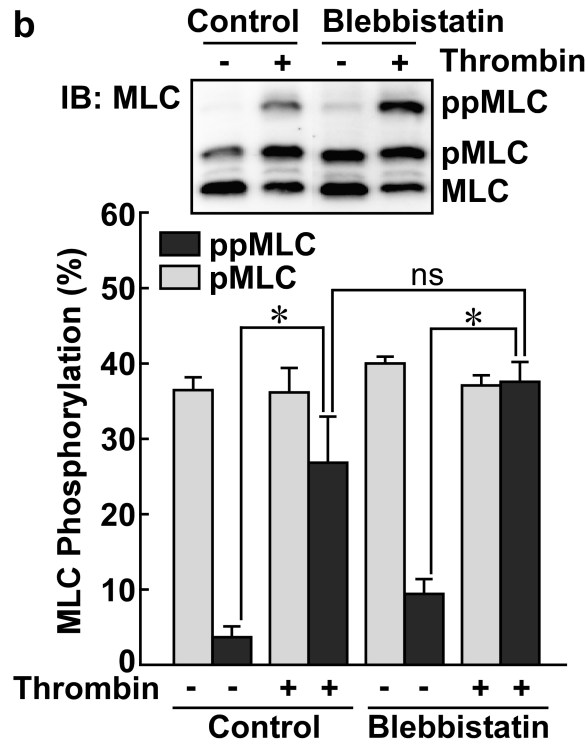

Supplement: srep20989-s1.pdf [file srep20989-s1.pdf]
